1 **Article Type:** Letters

2 **Title:** Microbial community composition is affected by press, but not pulse, seawater intrusion.

3

4 **Authors:** Courtney Mobilian (cmobilia@iu.edu)<sup>1</sup>, Nathan I. Wisnoski (wisnoski@indiana.edu)<sup>2</sup>,

5 Jay T. Lennon (lennonj@indiana.edu)<sup>2</sup>, Meryll Alber (malber@uga.edu)<sup>3</sup>, Sarah Widney

6 (sewidney@gmail.com)<sup>1</sup> and Christopher B. Craft (ccraft@indiana.edu)<sup>1</sup>

7

8 **Author Affiliations:**

9 <sup>1</sup> School of Public and Environmental Affairs, Indiana University, Bloomington, Indiana, USA

10 <sup>2</sup> Department of Biology, Indiana University, Bloomington, Indiana, USA

11 <sup>3</sup> Department of Marine Sciences, University of Georgia, Athens, GA, USA

12

13 **Corresponding Author:**

14 Christopher Craft (ccraft@indiana.edu)

15

16 **Author Contribution Statement:**

17 CC and MA designed the study. MA supported lab analysis (DNA extraction). SW conducted

18 field work. JL and NW conducted statistical analyses. CM, NW, JL, and CC wrote the paper.

19 **Scientific Significance Statement:**

20 Sea level rise and seawater intrusion threaten tidal freshwater marshes (TFMs) and the important  
21 ecosystem services they provide. Intrusion of seawater in TFMs can occur across a range of  
22 timescales, such as episodic events, like storm surges or drought, or continuous intrusion as a  
23 result of rising sea level. The effects of these stressors on TFM microbial communities are not  
24 well understood. Our multi-year field manipulation of brackish water inputs revealed that  
25 microbial communities were resilient to short-term pulses of salinity whereas continuous  
26 seawater intrusion led to reduced microbial diversity along with changes in relative abundance of  
27 key functional groups. Such alterations may diminish the ability of TFMs to sequester carbon  
28 and cycle nutrients.

29  
30  
31

32 **Data Availability Statement:**

33 Sequence data is available on the NCBI SRA (BioProject PRJNA611801). Data, metadata, and  
34 code used to generate results will be made publicly available on a Zenodo archive (Accession #  
35 and doi pending) of the GitHub repository <https://github.com/LennonLab/MicroMarsh>.

36

37 **Abstract:**

38 Tidal freshwater marshes (TFMs) are threatened by seawater intrusion, which can affect  
39 microbial communities and alter biogeochemical processes. Here, we report on Seawater  
40 Addition Long Term Experiment (SALTEX), a manipulative field experiment that investigated  
41 continuous (press) and episodic (pulse, 2 months/yr) inputs of brackish water on microbial  
42 communities in a TFM. After 2.5 years, microbial diversity was lower in press treatments than in  
43 control (untreated) plots. Sulfate reducers increased in response to both press and pulse  
44 treatments whereas methanogens did not differ among treatments. Our results suggest that  
45 microbial communities in TFMs are resilient to episodic events, but that continuous seawater  
46 intrusion may alter bacterial diversity in ways that affect ecosystem functioning.

47

48 **Keywords:** Microbial diversity, community composition, seawater intrusion, disturbance, pulse,  
49 press, tidal freshwater marsh, climate change

50

51

52 **INTRODUCTION**

53 Tidal freshwater marshes (TFMs) provide important ecosystem services such as carbon (C)  
54 sequestration (Loomis and Craft 2010), water quality improvement through the removal of  
55 nutrients such as nitrogen (N) and phosphorus (P) (Gribsholt et al. 2005; Neubauer et al. 2005),  
56 and protection from storm surges (Barbier et al. 2013), while also supporting high biodiversity of  
57 plants, animals, and microbial communities (Odum 1988). However, TFMs are threatened by

58 climate change and rising seas, which are predicted to increase an additional 0.4-1.2 meters by  
59 the end of the century (Horton et al. 2014). Sea level rise is expected to lead to seawater intrusion  
60 into TFMs and tidal freshwater forests, converting them to brackish marshes, mud flats, or open  
61 water (DeLaune et al. 1994; Herbert et al. 2015). TFMs will also experience episodic (pulse)  
62 seawater intrusion owing to more frequent and longer periods of drought, increased occurrence  
63 of storm surges, and decreased freshwater inputs from rivers (van Vliet et al. 2013). It is unclear  
64 how these at-risk ecosystems will respond to increased salinity from such continuous and  
65 episodic incursions of seawater.

66 Salinity alters biogeochemical processes in tidal marshes, due in part to changes in both the  
67 activity and composition of microbial communities (Reed and Martiny 2013). Seawater intrusion  
68 modifies the composition and availability of electron acceptors, such as sulfate (Capone and  
69 Kiene 1988). Higher sulfate levels could lead to major shifts in the dominant microbial  
70 functional groups in TFMs, such as an increased abundance of sulfate reducers and a decrease in  
71 methanogens in response to altered redox conditions (Weston et al. 2006). While some microbial  
72 communities are thought to be resistant and resilient to environmental change (Shade et al.  
73 2012), it is unclear how TFM microbial communities will respond to seawater inputs in the  
74 coming decades.

75 Microbial responses may depend on the amount, timing, and duration of seawater intrusions.  
76 For example, reciprocal transplants of salt marsh soils into a freshwater habitat revealed that,  
77 after 40 days, abundance of methanogens (*mcrA*) increased, but the abundance of sulfate  
78 reducers (*dsrA*) was unaffected (Morrissey and Franklin 2015). However, after 40 days,  
79 communities remained more phylogenetically related to their "home" environment compared to  
80 the "away" environment, suggesting that microorganisms are resilient to short-term perturbations

81 (Morrissey and Franklin 2015). In a one-year study, transplanting TFM soils into a mesohaline  
82 environment led to an increased abundance of sulfate reducing bacteria (Dang et al. 2019).  
83 Together, these studies demonstrate that microorganisms can be sensitive to changes in salinity,  
84 but that the responses may depend on the duration of the perturbation.

85 In this study, we evaluated changes in the microbial community in response to episodic  
86 (pulse) and continuous (press) seawater intrusions by conducting a field-scale manipulation. In  
87 our experiment, replicated TFM plots (n=6) received press or pulse additions of brackish water,  
88 freshwater, or were left untreated (control). We hypothesized that microbial diversity would  
89 differ between plots receiving continuous and episodic seawater intrusion. We also hypothesized  
90 there would be increased abundance of sulfate reducers and decreased abundance of  
91 methanogens in plots receiving seawater additions relative to plots not receiving seawater  
92 additions.

93

94

## METHODS

### *Site Description and Experimental Design*

96 The experiment, Seawater Addition Long-Term Experiment (SALTE<sub>x</sub>), was conducted in a  
97 TFM on the Altamaha River Georgia, USA, as part of the Georgia Coastal Ecosystems Long  
98 Term Ecological Research (GCE-LTER) project (<http://gce-lter.marsci.uga.edu/>) (Figure S1).  
99 The site is dominated by giant cutgrass, *Zizaniopsis miliacea* Michx, and experiences twice-daily  
100 tidal inundations of freshwater with an average flooding depth of 25 cm at high tide (Widney et  
101 al. 2019). Details of the long-term experiment can be found elsewhere (Herbert et al. 2018,  
102 Widney et al. 2019), but briefly, we established 2.5 x 2.5 m replicated (n = 6 per treatment) plots  
103 at the site, which were randomly assigned to one of the following treatment groups: Control,

104 Fresh, Pulse salinity, and Press salinity. Beginning in April 2014, Press plots were dosed four  
105 times per week with approximately 265 L of treatment water (~15 ppt salinity), consisting of an  
106 equal mixture of seawater and fresh river water. Pulse plots were dosed four times per week with  
107 treatment water in September and October, during natural low river flow and dosed with fresh  
108 river water the remaining 10 months of the year. Fresh plots were dosed with fresh river water  
109 four times per week. Control (untreated) plots did not receive brackish water but, like the other  
110 treatments, were regularly inundated by the tides.

111

### 112 *Sample Collection and Environmental Variables*

113 After treatment additions for 2.5 years, we collected soil samples (0-10 cm) from each of the four  
114 replicate plots from each treatment group in October 2016. Soils were placed in a cooler and  
115 shipped frozen to Indiana University where they were stored in a -80°C freezer until ready for  
116 DNA extraction.

117 We also measured porewater ammonium ( $\text{NH}_4^+$ ), nitrate ( $\text{NO}_3^-$ ), dissolved reactive  
118 phosphorus (DRP), and soil surface temperature quarterly, including October 2016, to identify  
119 potential drivers of community structure in each treatment. Porewater results and details on  
120 methods are described in more detail elsewhere (Herbert et al. 2018; Widney et al. 2019).

121

### 122 *Microbial Characterization*

123 We characterized bacterial and archaeal composition using 16S rRNA amplicon sequencing.

124 After extracting DNA from each sample using a MoBio PowerSoil DNA extraction kit

125 (Carlsbad, CA), we amplified the V4 region of the 16S rRNA gene using 5PRIME

126 HotMasterMix and 515F and 806R primers with customized Illumina sequencing adapters and

127 unique sample barcodes following conditions described in detail elsewhere (Daum 2017).  
128 Amplicons were then pooled at approximately equal molar concentrations after quantification  
129 using a Roche LightCycler 480 real-time PCR instrument. The pooled sample was then  
130 sequenced on the MiSeq sequencing platform with a v3 600 Reagent kit following a 2x300  
131 indexed run recipe at the at the Joint Genome Institute in Walnut Creek, California. Raw  
132 sequences were processed using the iTagger v. 2.2 pipeline  
133 ([https://bitbucket.org/berkeleylab/jgi\\_itagger/src/itagger2/](https://bitbucket.org/berkeleylab/jgi_itagger/src/itagger2/)) and USEARCH (v. 9.2). Briefly,  
134 paired end reads were merged and quality filtered using expected error filtering. The resulting  
135 sequences were then incrementally clustered into operational taxonomic units (OTUs) starting at  
136 99% identity and sequentially increasing the clustering radius by 1%. Finally, OTUs were  
137 classified using the Ribosomal Database Project (RDP) reference. The final OTU table and  
138 metadata can be found in the Zenodo archive (Craft et al. 2020), and raw sequence data are  
139 available at the NCBI Sequence Read Archive (BioProject PRJNA611801).

140

#### 141 *Diversity Analysis*

142 To assess microbial responses to seawater intrusion, we compared patterns of  $\alpha$ - and  $\beta$ -diversity  
143 among treatments. We performed rarefaction on the community data, subsampling communities  
144 to 143,105 reads, and then relativized operational taxonomic unit (OTU) abundances to the total  
145 number of reads per sample. We characterized within-sample ( $\alpha$ ) diversity as the effective  
146 number of OTUs by taking the exponential of Shannon's index (i.e., Hill number with degree =  
147 1), which improves comparisons among groups (Jost 2006). We used ANOVA to compare  
148 differences in  $\alpha$ -diversity among treatments, followed by Tukey's Honest Significant Difference  
149 method to generate confidence intervals for group differences. To explain differences in

150 community structure among treatments (i.e.,  $\beta$ -diversity), we first transformed OTU relative  
151 abundances with the Hellinger transformation, and then used permutational multivariate  
152 ANOVA (PERMANOVA) to determine the significance of the treatment effects. We used  
153 redundancy analysis (RDA) to quantify the importance of individual environmental variables  
154 (porewater salinity, sulfides,  $\text{NH}_4^+$ ,  $\text{NO}_3^-$ , and DRP) for explaining community differences  
155 among treatments.

156 We also analyzed the responses of two key functional groups to the experimental  
157 manipulations. First, we classified potential sulfate reducers as a subset of 16S rRNA sequences  
158 belonging to the following orders in the  $\delta$ -Proteobacteria: Desulfuromonadales, Desulfarculales,  
159 Desulfobacterales, Desulfovibrionales, Desulfurellales, while recognizing that this may be an  
160 incomplete estimate of sulfate reducers. Second, we classified potential methanogens based on  
161 the summed relative abundances of archaeal sequences belonging to the following orders:  
162 Methanobacteriales, Methanomicrobiales, Methanosarcinales, and Methanocellales. We used  
163 ANOVA and Tukey's method to determine the significance and effects of experimental  
164 treatments on the relative abundances of these taxonomic groups in the communities. All  
165 analyses were completed using the R environment (v. 3.6.0) and the vegan R package (Oksanen  
166 et al. 2019).

167

168

## RESULTS

### 169 *Microbial Composition*

170 Although Pulse additions had no effect on  $\alpha$ -diversity relative to the Control treatment (Tukey  
171 HSD,  $p = 0.441$ ), Press inputs of seawater reduced  $\alpha$ -diversity by 25% (ANOVA,  $F_{3,11} = 4.98$ ,  $p$   
172  $= 0.017$ , Figure 1). Seawater additions also affected microbial community composition

173 (PERMANOVA,  $F_{3,11} = 4.43$ ,  $p = 0.001$ ,  $r^2 = 0.55$ ). Based on the ordination plot from our RDA,  
174 community composition in Press treatments diverged from the composition of other treatments,  
175 while composition in the Pulse treatments was more similar to the Control and Fresh treatments  
176 (Figure 2). Microbial composition in the Pulse treatment was associated with higher porewater  
177 salinity, sulfides, and inorganic nitrogen ( $\text{NO}_3^-$ ) than control and freshwater treatments (Table 1,  
178 Figure 2). Porewater in the Pulse treatments experienced transient changes during dosing, such  
179 as increased salinity and sulfides, that returned to background levels after dosing ceased (Figure  
180 3) (Widney et al. 2019). Our RDA also revealed that, while also having increased salinity, the  
181 Press treatment was distinguished from Pulse and other treatments by higher porewater  $\text{NH}_4^+$ ,  
182 dissolved reactive phosphorus (DRP), and soil surface temperature (Table 1, Figure 2).  
183 Continuous (press) salinity also led to more persistent changes in porewater chemistry, including  
184 increased salinity, ammonium, and sulfides for the duration of the experiment (Figure 3)  
185 (Widney et al. 2019).

186 Seawater manipulations also had an effect on some microbial functional groups. For  
187 example, the relative abundance of sulfate reducers was nearly double in the Press plots (6.5%,  
188 Tukey HSD,  $p = 0.0004$ ) than in Control treatments (3.5%) (ANOVA,  $F_{3,11} = 15.34$ ,  $p = 0.003$ ,  
189 Figure 4a). In addition, sulfate reducers were enriched in the Pulse treatment (6%) compared to  
190 the Control treatment (3.5%) (Tukey HSD,  $p = 0.0078$ ) (Figure 4a). The relative abundance of  
191 sulfate reducers was also greater in the Press (Tukey, HSD,  $p = 0.0019$ ) compared to the Fresh  
192 treatment and marginally greater in the Pulse compared to the Fresh treatment (Tukey HSD,  $p =$   
193  $0.054$ ) (Figure 4a). Relative abundance of sulfate reducers did not differ between Press and Pulse  
194 treatments (Tukey HSD,  $p = 0.23$ ). Contrary to our prediction, the relative abundance of



195 methanogens, which ranged from 0.5 to 1.5%, did not differ among treatments (ANOVA,  $F_{3,11} =$   
196 0.494,  $p = 0.694$ ) (Figure 4b).

197

198

## DISCUSSION

199 Salinity is an important driver of microbial community composition (Lozupone and Knight 2007;  
200 Morrissey et al. 2014), which can in turn affect biogeochemical processes including carbon  
201 sequestration (Weston et al. 2011; Neubauer et al. 2013; Morrissey et al. 2014). In this study, we  
202 observed reduced microbial diversity, altered microbial composition, and an increase in the  
203 relative abundance of sulfate reducing bacteria (SRB) in response to continuous (press) seawater  
204 intrusion for 2.5 years. In contrast, our results suggest that microbial communities in TFMs are  
205 less affected by episodic (pulse) seawater intrusion. Taken together, our study indicates that  
206 modified salinization regimes in TFMs may have implications for sulfur cycling, in particular  
207 increased potential for sulfate reduction, that emerge over longer time scales of seawater  
208 intrusion.

209 Microbial community composition in the Pulse plots was different from both the Control and  
210 the Press treatments (Figure 2). Relative to Control treatments, Pulse plots had a greater  
211 abundance of sulfate reducers (Figure 4a) but no difference in diversity (Figure 1). Other short-  
212 term studies have also reported no change in diversity in response to increased salinity (e.g.,  
213 Edmonds et al. 2009 after 3 weeks of dosing, and Dang et al. 2019 after 1 year), similar to the  
214 response we observed in our Pulse plots. In response to Press seawater additions, SRB became  
215 even more common in the community (Figure 4a), and we were able to detect overall declines in  
216 microbial diversity (Figure 1) and more extreme shifts in community composition (Figure 2).

217 Thus, our study suggests that the frequency and duration of seawater intrusion affect the  
218 diversity and structure of TFM microbial communities.

219 Changes in the abundances of SRB could affect community diversity. Consistent with our  
220 hypothesis, we found greater abundance of SRB in Press plots (Figure 4a), which had higher  
221 concentrations of porewater sulfide compared to other treatments (Figure 3) (Widney et al.  
222 2019). Our results are also consistent with other studies (Weston et al. 2006, 2011; Dang et al.  
223 2019), including a transplant study of freshwater marsh soils into a brackish marsh that found a  
224 slight increase in abundance of sulfate reducers (*dsrA*) (Dang et al. 2019). A shift in the  
225 microbial community towards SRB has the potential to negatively affect other members of the  
226 community because sulfate reduction can generate hydrogen sulfide that is toxic to more  
227 sensitive members of the community. Thus, long-term, chronic inputs of seawater that maintain  
228 elevated concentrations of porewater sulfide could favor SRB and the production of hydrogen  
229 sulfide, which contribute to the reduction in overall microbial diversity.

230 Sulfate is an electron acceptor that can support sulfate reduction and this reaction is more  
231 thermodynamically favorable than methanogenesis. Therefore, we predicted that increases in  
232 SRB would be accompanied by a decrease in the relative abundance of methanogens. We did not  
233 observe this pattern in our data. As methanogenesis relies on decomposition of organic matter,  
234 other studies have indicated that methanogen abundances may be influenced by carbon  
235 availability (DOC and soil organic carbon) (Yuan et al. 2016; Dang et al. 2019). Although  
236 previous work from our experiment observed lower methane emissions in the Press treatment,  
237 there was little variation in methane production or DOC concentration across treatments during  
238 the month of October 2016 when the samples from the current study were collected (Herbert et  
239 al. 2018) suggesting that C limitation constrained the abundances of methanogens across all

240 treatments. Sulfate-mediated anaerobic oxidation of methane (AOM), where sulfate is used as an  
241 electron acceptor for AOM, has been shown to be important in tidal freshwater sediments of the  
242 Altamaha River (Segarra et al. 2015) and could account for reduced CH<sub>4</sub> emissions from our  
243 Press plots.

244 Microbial community responses to seawater intrusion may also depend on the concentrations  
245 of other nutrients. For example, in a lab microcosm experiment, where wetland sediments were  
246 exposed to both increasing salinity and nutrients (N, P), salinity alone increased bacterial  
247 diversity, whereas N additions (nitrate, ammonium) and the combination of increased salinity,  
248 nitrogen and phosphorus decreased diversity (Jackson and Vallaire 2009). In our long-term field  
249 experiment, Press additions of brackish water resulted in not only elevated salinity but also  
250 higher porewater inorganic nitrogen (ammonium, nitrate) concentrations compared to the other  
251 treatments (Figure 3) (Herbert et al. 2018; Widney et al. 2019) which could explain the reduced  
252  $\alpha$ -diversity in the Press plots.  $\alpha$ -diversity did not differ between Pulse and Control treatments  
253 and, while the Pulse plots experienced transient increases in salinity, porewater N did not  
254 increase as it did in the Press plots (Herbert et al. 2018; Widney et al. 2019).

255 Shifts in microbial community structure may also be facilitated by the immigration of taxa  
256 that accompanied the intrusion water. That is, seawater additions not only cause the mixing of  
257 freshwater and brackish environments, they also lead to the mixing of brackish and freshwater  
258 microorganisms, a phenomenon referred to as “community coalescence” (Rillig et al. 2015). The  
259 resulting community composition may depend on many factors, including (1) differences in  
260 environmental conditions, where seawater was added to a freshwater environment and (2) the  
261 temporal dynamics of mixing (Rillig et al. 2015). For example, Pulse seawater additions  
262 temporarily modified the environment (for ~2 months, Figure 3), but this treatment may have

263 been insufficient to overcome the larger and more frequent additions of fresh river water and  
264 freshwater microorganisms during the natural tidal cycle. As a result, microbial communities in  
265 Pulse plots were only slightly different from the Control and Fresh treatments (Figure 2).

266 In conclusion, continuous seawater intrusion can reduce microbial diversity and alter  
267 community composition, which may be due to increases in porewater sulfate that favor an  
268 increase in abundance of sulfate reducers. Episodic seawater additions did not affect  $\alpha$ -diversity  
269 but increased sulfate reducer abundance, suggesting that microbial communities of the Pulse  
270 treatment retain environmental and microbial characteristics of freshwater tidal marshes. The  
271 increase in sulfate reducers (and sulfate reduction) we observed in the Press plots may have  
272 implications for C and nutrient (P) cycles, such as increased C mineralization and phosphorus  
273 release. Furthermore, the decline in microbial diversity in Press plots may reduce the functional  
274 redundancy of these and other microbial processes.

275

## 276 **Acknowledgements**

277 We thank Ellen Herbert for collecting the soil samples for analysis and thank Steve Reynolds for  
278 extracting DNA.

279

## 280 **Funding**

281 This study was funded by the U.S. Department of Energy, Joint Genome Institute (JGI): Project  
282 ID 1178283 and the National Science Foundation's Long-Term Ecological Research (LTER)  
283 program (Georgia Coastal Ecosystems LTER, OCE-1832178 and OCE-1237140). The work  
284 conducted by the U.S. Department of Energy Joint Genome Institute, a DOE Office of Science  
285 User Facility, is supported by the Office of Science of the U.S. Department of Energy under

286 Contract No. DE-AC02-05CH11231. We also acknowledge the National Science Foundation  
287 (1442246, J.T.L.) and a US Army Research Office Grant (W911NF-14-1-0411, J.T.L.) for  
288 financial support.

289 **References**

- 290 Barbier, E.B., Georgiou, I.Y., Enchelmeier, B., and Reed, J.D. 2013. The value of wetlands in  
291 protecting southeast Louisiana from hurricane storm surges. *PLoS ONE* 8(3): e58715,  
292 doi:10.1371/journal.pone.0058715.
- 293 Craft, C.B., Lennon, J.T., Wisnoski, N.I, and Moberian, C. 2020. Soil microbial communities in a  
294 tidal freshwater marsh being experimentally dosed with episodic (pulse) and continuous  
295 (press) additions of seawater. Zenodo Doi pending final acceptance.
- 296 Capone, D.G. and Kiene, R.P. 1988. Comparison of microbial dynamics in marine and  
297 freshwater sediments: Contrasts in anaerobic carbon catabolism. *Limnol. Oceanogr.* 33:  
298 725-749, doi:10.4319/lo.1988.33.4part2.0725.
- 299 Dang, C., Morrissey, E.M., Neubauer, S.C., and Franklin, R.B. 2019. Novel microbial  
300 community composition and carbon biogeochemistry emerge over time following  
301 saltwater intrusion in wetlands. *Global Change Biol.* 25: 549-561,  
302 doi:10.1111/gcb.14486.
- 303 Daum, C. 2017. iTag sample preparation for Illumina sequencing. Joint Genome Institute, ITag  
304 Sample Preparation SOP; [https://1ofdmq2n8tc36m6i46scovo2e-wpengine.netdna-](https://1ofdmq2n8tc36m6i46scovo2e-wpengine.netdna-ssl.com/wp-content/uploads/2019/07/iTag-Sample-Preparation-for-Illumina-Sequencing-SOP-v1.0.pdf)  
305 [ssl.com/wp-content/uploads/2019/07/iTag-Sample-Preparation-for-Illumina-Sequencing-](https://1ofdmq2n8tc36m6i46scovo2e-wpengine.netdna-ssl.com/wp-content/uploads/2019/07/iTag-Sample-Preparation-for-Illumina-Sequencing-SOP-v1.0.pdf)  
306 [SOP-v1.0.pdf](https://1ofdmq2n8tc36m6i46scovo2e-wpengine.netdna-ssl.com/wp-content/uploads/2019/07/iTag-Sample-Preparation-for-Illumina-Sequencing-SOP-v1.0.pdf).
- 307 DeLaune, R.D., Nyman, J.A., and Patrick, W.H., Jr. 1994. Peat collapse, ponding, and wetland  
308 loss in a rapidly submerging coastal marsh. *J. Coast. Res.* 10(4): 1021-1030.
- 309 Edmonds, J.W., Weston, N.B., Joye, S.B., Mou, X., and Moran, M.A. 2009. Microbial  
310 community response to seawater amendment in low-salinity tidal sediments. *Microb.*  
311 *Ecol.* 58: 558-568, doi:10.1007/s00248-009-9556-2.
- 312 Gribsholt, B., Boschker, H.T.S., Struyf, E., Andersson, M., Tramper, A., Brabandere, L.D., van  
313 Damme, S., Brion, N., Miere, P., Dehairs, F., Middleburg, J.J., and Heip, C.H.R. 2005.  
314 Nitrogen processing in a tidal freshwater marsh: a whole-ecosystem <sup>15</sup>N labeling study.  
315 *Limnol. Oceanog.* 50(6): 1945-1959, doi:10.4319/lo.2005.50.6.1945.
- 316 Herbert, E.R., Boon, P., Burgin, A.J., Neubauer, S.C., Franklin, R.B., Ardon, M., Hopfensperger,  
317 K.N., Lamers, L.P.M., and Gell, P. 2015. A global perspective on wetland salinization:  
318 ecological consequences of a growing threat to freshwater wetlands. *Ecosphere* 6(10): 1-  
319 43, doi:10.1890/ES14-00534.1.
- 320 Herbert, E.R., Schubauer-Bergian, J., and Craft, C.B. 2018. Differential effects of chronic and  
321 acute simulated seawater intrusion on tidal freshwater marsh carbon cycling.  
322 *Biogeochemistry* 138(2): 137-154, doi:10.1007/s10533-018-0436-z.
- 323 Horton, B.P., Rahmstorf, S., Engelhart, S.E., and Kemp, A.C. 2014. Expert assessment of sea-  
324 level rise by AD 2100 and AD 2300. *Quat. Sci. Rev.* 84: 1-6,  
325 doi:10.1016/j.quascirev.2013.11.002.
- 326 Jackson, C.R. and Vallaire, S.C. 2009. Effects of salinity and nutrients on microbial assemblages  
327 in Louisiana wetland sediments. *Wetlands* 29(1): 277-287, doi:10.1672/08-86.1.
- 328 Jost, L. 2006. Entropy and Diversity. *Oikos* 113: 363-375, doi:10.1111/j.2006.0030-  
329 1299.14714.x.
- 330 Loomis, M. and Craft, C. 2010. Carbon sequestration and nutrient (nitrogen, phosphorus)

- 331 accumulation in river-dominated tidal marshes, Georgia, USA. *Soil Sci. Soc. Am. J.*  
332 74(3): 1028-1036, doi:10.2136/sssaj2009.0171.
- 333 Lozupone, C.A. and Knight, R. 2007. Global patterns in bacterial diversity. *PNAS* 104(27):  
334 11436-11440, doi:10.1073/pnas.0611525104.
- 335 Morrissey, E.M., Gillespie, J.L., Morina, J.C., and Franklin, R.B. 2014. Salinity affects microbial  
336 activity and soil organic matter content in tidal wetlands. *Global Change Biol.* 20: 1351-  
337 1362, doi:10.1111/gcb.12431.
- 338 Morrissey, E.M. and Franklin, R.B. 2015. Evolutionary history influences the salinity preference  
339 of bacterial taxa in wetland soils. *Front. Microbiol.* 6: 1013,  
340 doi:10.3389/fmicb.2015.01013.
- 341 Neubauer, S.C., Anderson, I.C., and Neikirk, B.B. 2005. Nitrogen cycling and ecosystem  
342 exchanges in a Virginia freshwater marsh. *Estuaries* 28(6): 909-922,  
343 doi:10.1007/BF02696019.
- 344 Neubauer, S.C., Franklin, R.B., and Berrier, D.J. 2013. Saltwater intrusion into tidal freshwater  
345 marshes alters the biogeochemical processing of organic carbon. *Biogeosciences* 10:  
346 8171-8183, doi:10.5194/bg-10-8171-2013.
- 347 Odum, W.E. 1988. Comparative ecology of tidal freshwater and salt marshes. *Annu. Rev.*  
348 *Ecol. Syst.* 19: 147-176, doi:10.1146/annurev.es.19.110188.001051.
- 349 Oksanen, J., Guillaume Blanchet, F.G., Friendly, M., Kindt, R., Legendre, P., McGlinn, D.,  
350 Minchin, P.R., O'Hara, R.B., Simpson, G.L., Solymos, P., Stevens, M.H.H., Szoecs, E.,  
351 and Wagner, H. 2019. vegan: Community Ecology Package. R package version 2.5-6.  
352 <https://CRAN.R-project.org/package=vegan>.
- 353 Reed, H.E. and Martiny, J.B.H. 2013. Microbial composition affects the function of estuarine  
354 sediments. *ISME Journal* 7: 868-879, doi:10.1038/ismej.2012.154.
- 355 Rillig, M.C., Lehmann, A., Aquilar-Trigueros, C.A., Antonovics, J., Caruso, T., Hempel, S.,  
356 Lehmann, J., Valyi, K., Verbruggen, E., Veresoglou, S.D., and Powell, J.R. 2015.  
357 Interchange of entire communities: microbial community coalescence. *Trends Ecol. Evol.*  
358 30(8):470-476, doi: 10.1016/j.tree.2015.06.004.
- 359 Segarra, K.E.A., Schubotz, F., Samarkin, V., Yoshinaga, M.Y., Hinrichs, K.U., and Joye, S.B.  
360 2015. High rates of anaerobic methane oxidation in freshwater wetlands reduce potential  
361 atmospheric methane emissions. *Nat. Commun.* 6: 7477, doi: 10.1038/ncomms8477.
- 362 Shade, A., Peter, H., Allison, S.D., Baho, D.L., Berga, M., Burgmann, H., Huber, D.H.,  
363 Langenheder, S., Lennon, J.T., Martiny, J.B.H., Matulich, K.L., Schmidt, T.M., and  
364 Handelsman, J. 2012. Fundamentals of microbial community resistance and resilience.  
365 *Front. Microbiol.* 3, 437, doi:10.3389/fmicb.2012.00417.
- 366 van Vliet, M.T.H., Franssen, W.H.P., Yearsley, J.R., Ludwig, F., Haddeland, I., Lettenmaier,  
367 D.P., and Kabat, P. 2013. Global river discharge and water temperature under climate  
368 change. *Global Environ. Chang.* 23: 450-464, doi:10.1016/j.gloenvcha.2012.11.002.
- 369 Weston, N.B., Dixon, R.E., and Joye, S.B. 2006. Ramifications of increased salinity in tidal  
370 freshwater sediments: Geochemistry and microbial pathways of organic matter  
371 mineralization. *J. Geophys. Res. Atmos.* 111: G01009, doi:10.1029/2005JG000071.
- 372 Weston, N.B., Vile, M.A., Neubauer, S.C., and Velinsky, D.J. 2011. Accelerated microbial

373 organic matter mineralization following salt-water intrusion into tidal freshwater marsh  
374 soils. *Biogeochemistry* 102: 135-151, doi:10.1007/s10533-010-9427-4.  
375 Widney, S.E., Smith, D., Herbert, E.R., Schubauer-Berigan, J.P., Li, F., Pennings, S.F., and  
376 Craft, C.B. 2019. Chronic but not acute saltwater intrusion leads to large release of  
377 inorganic N in a tidal freshwater marsh. *Sci. Total Environ.* 695: 133779,  
378 doi:10.1016/j.scitotenv.2019.133779.  
379 Yuan, J., Ding, W., Liu, D., Kang, H., Xiang, J., and Lin, Y. 2016 Shifts in methanogen  
380 community structure and function across a coastal marsh transect: effects of  
381 exotic *Spartina alterniflora* invasion. *Sci. Rep.* 6: 18777, doi:10.1038/srep18777.



382 **List of Tables and Figures**

383 **Table 1.** Redundancy Analysis of microbial composition vs. environmental variables.

384 Correlations between environmental vectors and ordination axes are presented in the RDA1 and  
385 RDA2 columns.  $R^2$  values and p-values were determined by permutation ( $n = 999$ ) using the  
386 envfit function in the vegan R package.

387 **Figure 1.** Alpha diversity of the total DNA community in each treatment group. \* indicates Press  
388 is different from Control ( $p = 0.017$ ).

389 **Figure 2.** Redundancy analysis of microbial community structure with vectors depicting  
390 environmental variables along axes RDA1 and RDA2. Environmental data came from Herbert et  
391 al. 2018 and Widney et al. 2019.

392 **Figure 3.** Porewater salinity (a), sulfide (b), and ammonium (b) concentrations (means  $\pm$  SE) of  
393 treatments. Light gray shading indicates duration of Press treatment and darker gray shaded bars  
394 indicate the timing and duration of the Pulse treatment. Microbial samples were collected in  
395 October 2016. \*\* = Press > other treatments ( $p < 0.05$ ); \* = Press is greater than other treatments  
396 ( $p < 0.10$ ); # = Press > other treatments except Pulse ( $p < 0.05$ ); + = Pulse > other treatments except  
397 Press ( $p < 0.05$ ); ^ = Press and Pulse > other treatments ( $p < 0.05$ ). Figure modified from Widney et  
398 al. 2019.

399 **Figure 4** (a). Sulfate reducer abundance and (b). methanogen abundance based on the total DNA  
400 community. \* indicates Press is different from Control ( $p = 0.0004$ ) and Fresh ( $p = 0.0019$ ) and  
401 Pulse is different from Control ( $p = 0.0078$ ) and Fresh ( $p = 0.0539$ ).

402 **Figure S1.** Aerial view of the SALTE<sub>x</sub> experimental site in July 2014.

403  
404  
405  
406  
407  
408  
409  
410  
411  
412  
413  
414  
415  
416  
417  
418  
419  
420  
421  
422  
423  
424  
425

426 **Table 1.** Redundancy Analysis of microbial composition vs. environmental variables.  
427 Correlations between environmental vectors and ordination axes are presented in the RDA1 and  
428 RDA2 columns.  $R^2$  values and p-values were determined by permutation (n = 999) using the  
429 envfit function in the vegan R package.

430  
431  
432

|                              | RDA1 | RDA2  | $r^2$ | <i>p</i>     |
|------------------------------|------|-------|-------|--------------|
| DRP                          | 0.96 | 0.27  | 0.54  | <b>0.008</b> |
| NH <sub>4</sub> <sup>+</sup> | 0.93 | 0.37  | 0.80  | <b>0.001</b> |
| NO <sub>3</sub> <sup>-</sup> | 0.66 | -0.75 | 0.10  | 0.537        |
| Sulfide                      | 0.63 | -0.78 | 0.33  | 0.062        |
| Salinity                     | 0.55 | -0.83 | 0.67  | <b>0.001</b> |
| Soil Surface Temperature     | 0.99 | 0.16  | 0.87  | <b>0.001</b> |

433  
434  
435  
436  
437  
438  
439  
440  
441  
442  
443  
444  
445  
446  
447  
448  
449  
450  
451  
452  
453  
454

455

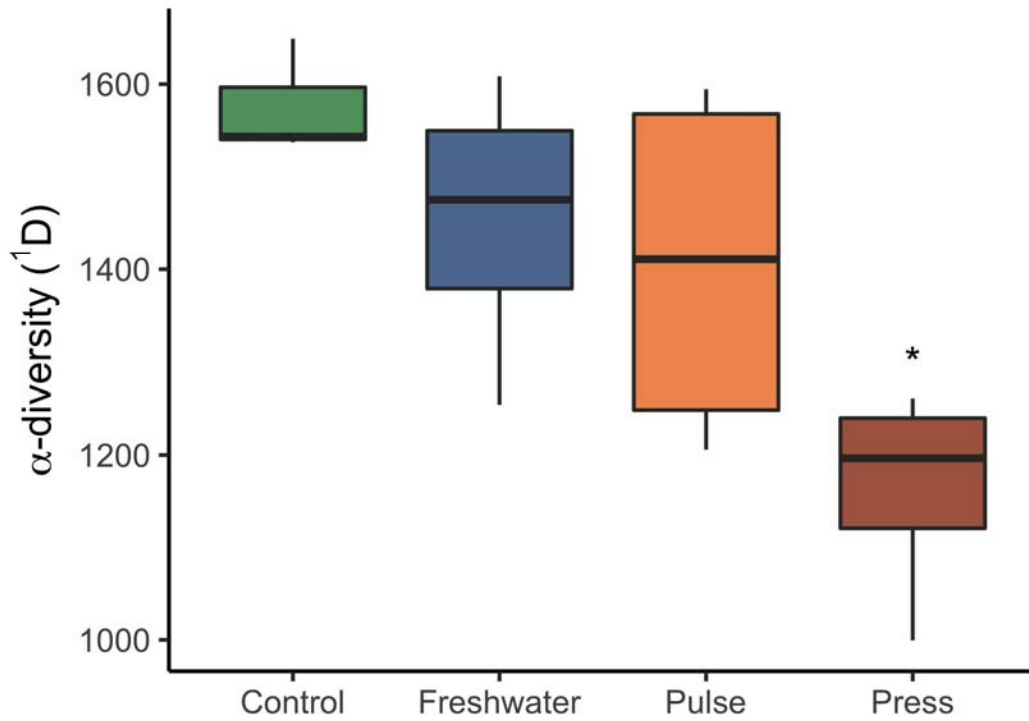

456 **Figure 1.** Alpha diversity of the total DNA community in each treatment group. \* indicates Press  
457 is different from Control ( $p = 0.017$ ).

458

459

460

461

462

463

464

465

466

467

468

469

470

471

472

473

474

475

476  
477  
478  
479  
480  
481  
482  
483  
484  
485  
486  
487  
488  
489  
490  
491  
492  
493  
494  
495  
496  
497  
498  
499  
500  
501

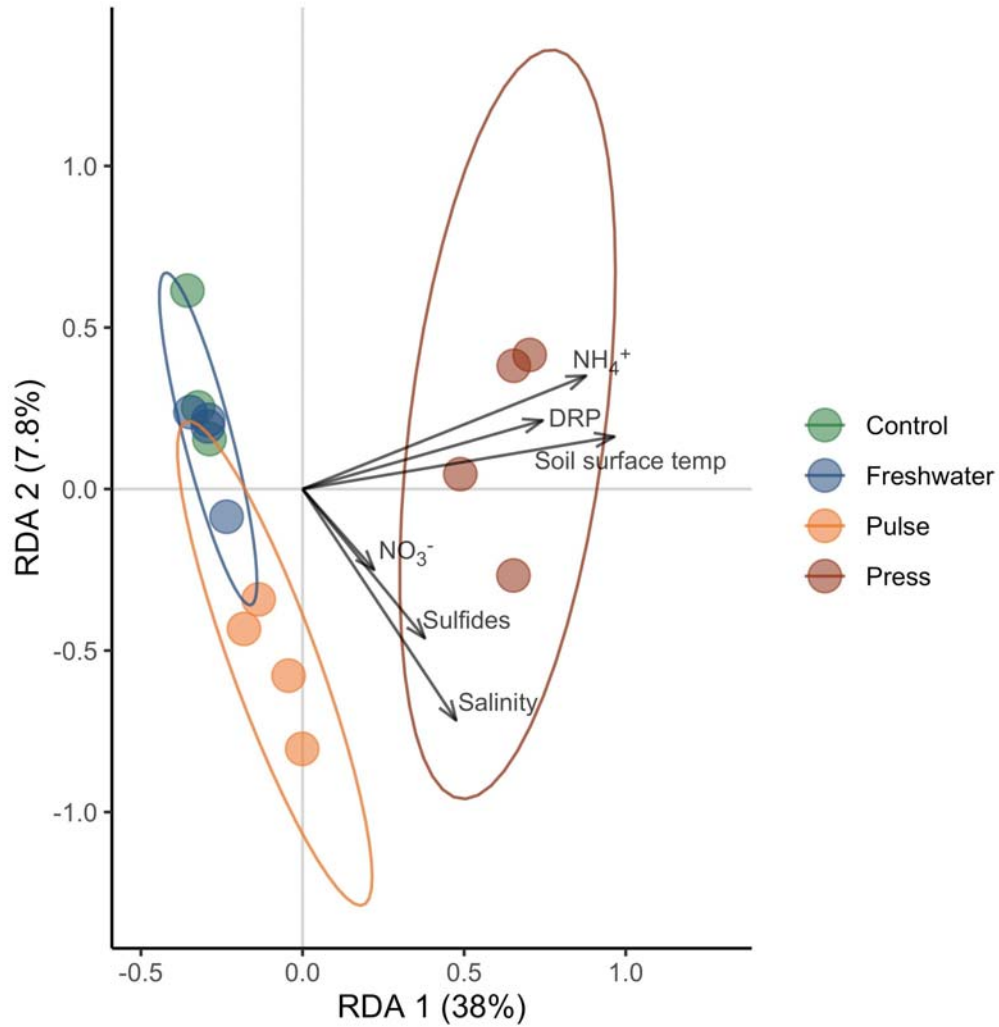

502 **Figure 2.** Redundancy analysis of microbial community structure with vectors depicting  
503 environmental variables along axes RDA1 and RDA2. Environmental data came from Herbert et  
504 al. 2018 and Widney et al. 2019.

505  
506  
507  
508  
509  
510  
511  
512  
513  
514  
515  
516

517  
518  
519  
520  
521  
522  
523  
524  
525  
526  
527  
528  
529  
530  
531  
532  
533  
534  
535  
536  
537  
538  
539  
540  
541  
542  
543  
544  
545  
546  
547  
548  
549  
550  
551  
552

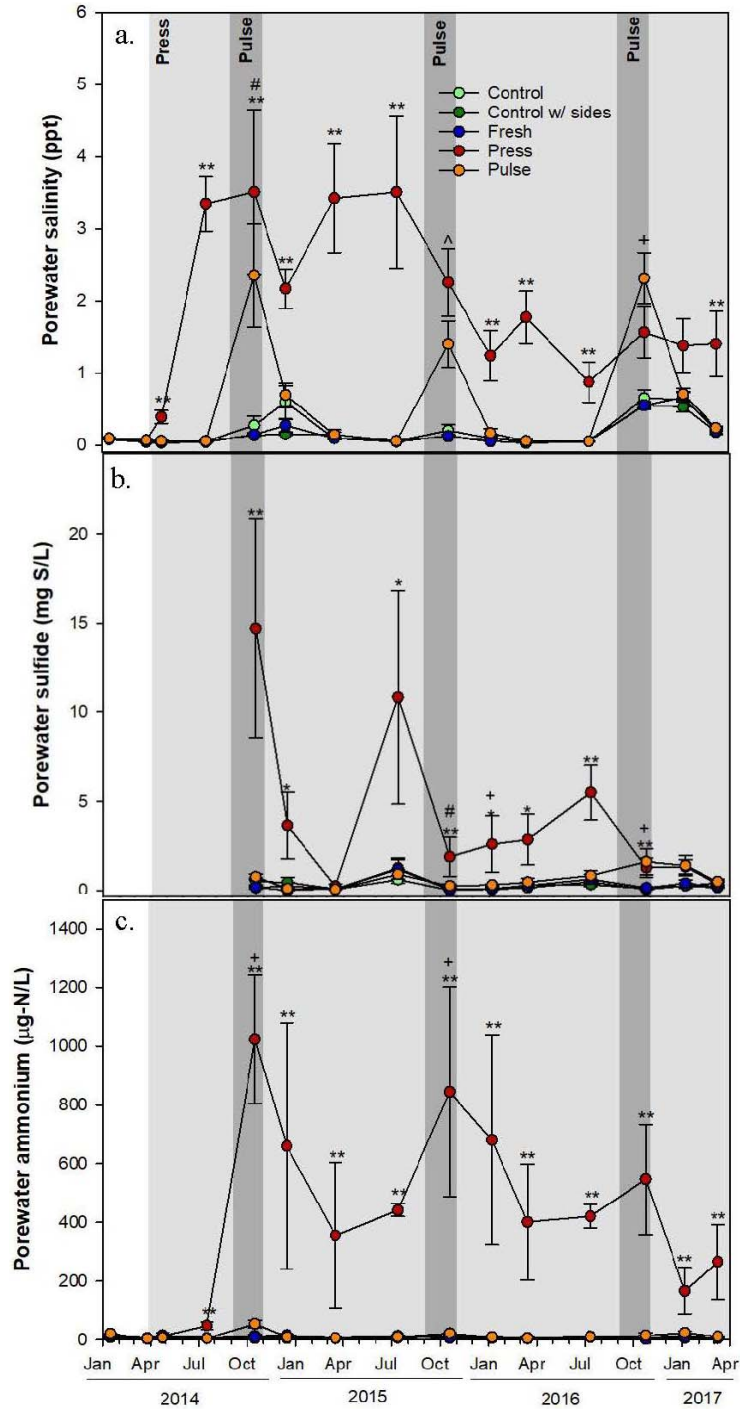

553 **Figure 3.** Porewater salinity (a), sulfide (b), and ammonium (b) concentrations (means  $\pm$  SE) of  
554 treatments. Light gray shading indicates duration of Press treatment and darker gray shaded bars  
555 indicate the timing and duration of the Pulse treatment. Microbial samples were collected in  
556 October 2016. \*\* = Press > other treatments ( $p < 0.05$ ); \* = Press is greater than other treatments  
557 ( $p < 0.10$ ); # = Press > other treatments except Pulse ( $p < 0.05$ ); + = Pulse > other treatments except  
558 Press ( $p < 0.05$ ); ^ = Press and Pulse > other treatments ( $p < 0.05$ ). Figure modified from Widney et  
559 al. 2019.

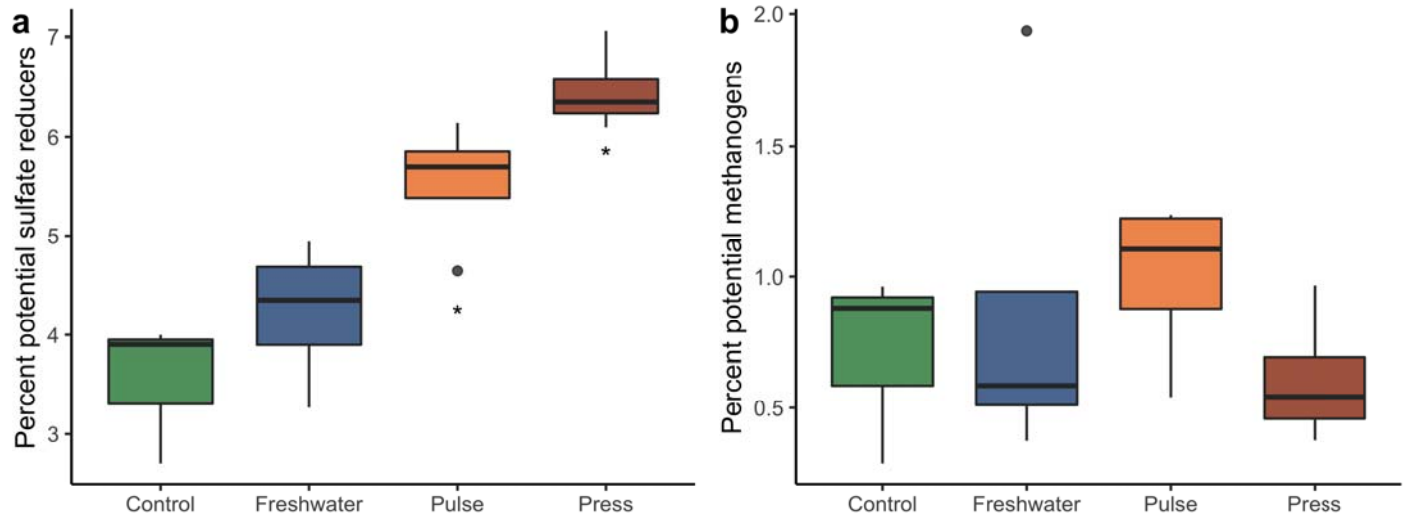

560 **Figure 4** (a). Sulfate reducer abundance and (b). methanogen abundance based on the total DNA  
561 community. \* indicates Press is different from Control ( $p = 0.0004$ ) and Fresh ( $p = 0.0019$ ) and  
562 Pulse is different from Control ( $p = 0.0078$ ) and Fresh ( $p = 0.0539$ ).  
563

564  
565

## Supplemental Information

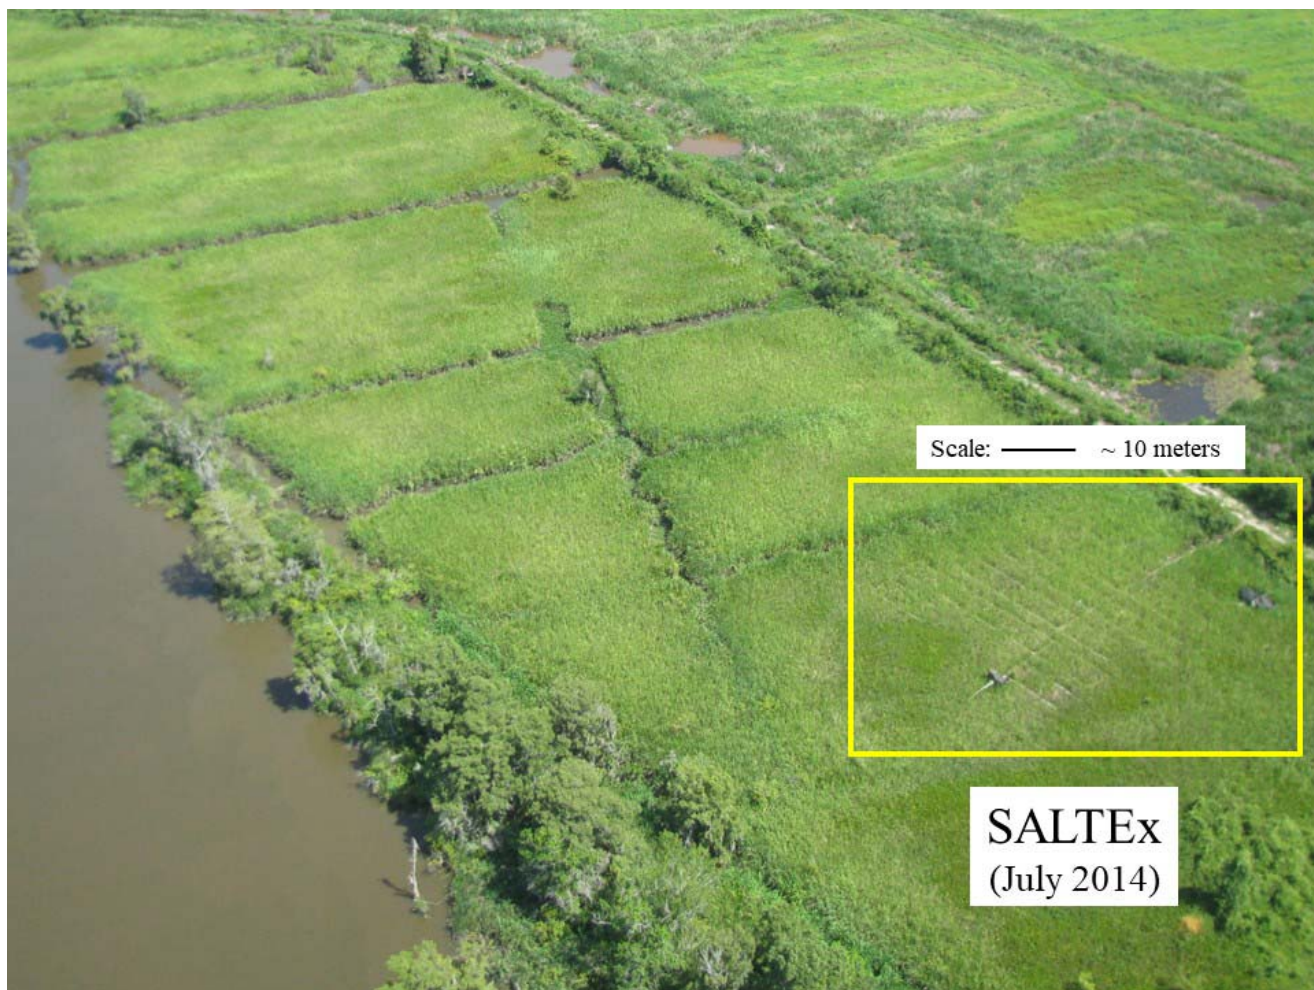

566  
567 **Figure S1.** Aerial view of the SALTE<sub>x</sub> experimental site in July 2014.
